# Supplementary material for: The Association of Metabolic Syndrome with the Initiation of Antidepressive Agents: Real-World Data Analysis of Administrative Claims and Health Examinations
Source: Research Square preprint supplement (doi:10.21203/rs.3.rs-1302206/v1), 2022-02-10
Supplement: Supplementary file 1 [file e8d55bf77067dee8339271ce.docx]

**Supplementary Table 1. Medicine list based on ATC classification**

| Drug class | Subclasses | ATC codes |
| --- | --- | --- |
| Antidepressant | SSRI, SNRI, NaSSA | N06 |
| Hypnotics | Benzodiazepine, non-benzodiazepine, orexin receptor antagonists, melatonin receptor agonists | N05C |
| Anxiolytics | Benzodiazepine | N05B |
| Antipsychotics | Lithium, multi-acting-receptor-targeted agents, serotonin-dopamine antagonists, Partial Dopamine antagonists, Selective D2/D3 antagonists | N05A |
| NSAIDs | Non-selective NSAIDs, Selective NSAIDs | M01A  N02B |
| Anti-hypertensive agents | Renin-angiotensin system inhibitors, calcium channel blockers, alpha-blockers, beta-blockers, diuretics, other types of antihypertensive agents | C02, C03, C05, C07, C08, C09 |
| Anti-diabetic agents | SGLT-2 inhibitors, metformin, sulfonylurea, DPP-4 inhibitors,  GLP-1RA, glinide, thiazolidine, acarbose, insulins | A10A, A10B |
| Statins | Statins | C10A |

ATC, anatomical therapeutic chemical; SSRI, selective serotonin reuptake inhibitor; SNRI, serotonin noradrenaline reuptake inhibitor; NaSSA, noradrenergic and specific serotonergic antidepressant; NSAIDs, non-steroid anti-inflammatory drugs; SGLT, sodium-glucose co-transporter; DPP-4, dipeptidyl peptidase-4; GLP-1RA, glucagon-like peptide-1 receptor agonists
